# Supplementary material for: An Association of an eBURST Group With Triazole Resistance of Candida tropicalis Blood Isolates
Source: PubMed Central journal article supplement (PMC7248567; doi:10.3389/fmicb.2020.00934), 2020-05-19
Supplement: Table_1.pdf [file Table_1.pdf]

**Supplementary Table S1: *In vitro* virulence comparison of *C. tropicalis* and *C. albicans* blood isolates**

| Virulent factors                    | Species              | Number (%) of isolates |           |                 |                             |             | P-value |
|-------------------------------------|----------------------|------------------------|-----------|-----------------|-----------------------------|-------------|---------|
|                                     |                      | Negative               | Weak/Low  | Medium/Positive | Strong/Strong positive/High | Very strong |         |
| Proteinase activity <sup>a</sup>    | <i>C. tropicalis</i> | 34 (70.8)              | 0 (0)     | 3 (6.3)         | 11 (22.9)                   | 0 (0)       | < 0.001 |
|                                     | <i>C. albicans</i>   | 46 (100)               | 0 (0)     | 0 (0)           | 0 (0)                       | 0 (0)       |         |
| Phospholipase activity <sup>a</sup> | <i>C. tropicalis</i> | 48 (100)               | 0 (0)     | 0 (0)           | 0 (0)                       | 0 (0)       | < 0.001 |
|                                     | <i>C. albicans</i>   | 0 (0)                  | 0 (0)     | 3 (5.5)         | 13 (28.3)                   | 30 (65.2)   |         |
| Hemolytic activity <sup>b</sup>     | <i>C. tropicalis</i> | 0 (0)                  | NA        | 10 (20.8)       | 38 (79.2)                   | NA          | < 0.001 |
|                                     | <i>C. albicans</i>   | 0 (0)                  | NA        | 28 (60.9)       | 18 (39.1)                   | NA          |         |
| Biofilm formation <sup>c</sup>      | <i>C. tropicalis</i> | 3 (6.2)                | 19 (39.6) | NA              | 26 (54.2)                   | NA          | 0.185   |
|                                     | <i>C. albicans</i>   | 8 (17.4)               | 13 (28.3) | NA              | 25 (54.3)                   | NA          |         |

Notes: <sup>a</sup>Proteinase and phospholipase activity: negative, weak, medium, strong, very strong; <sup>b</sup>Hemolytic activity: negative, positive, strong positive; <sup>c</sup>Biofilm formation: negative, low, high; NA: not applicable
