# Supplementary material for: An Association of an eBURST Group With Triazole Resistance of Candida tropicalis Blood Isolates
Source: PubMed Central journal article supplement (PMC7248567; doi:10.3389/fmicb.2020.00934), 2020-05-19
Supplement: Table_2.pdf [file Table_2.pdf]

**Supplementary Table S2: Antifungal susceptibility comparison between *C. tropicalis* and *C. albicans* blood isolates**

| Antifungal drugs            | Species              | Category number (%) |          |           | P-value |
|-----------------------------|----------------------|---------------------|----------|-----------|---------|
|                             |                      | S/WT                | SDD/I    | R/NWT     |         |
| Voriconazole                | <i>C. tropicalis</i> | 21 (43.8)           | 6 (12.4) | 21 (43.8) | < 0.001 |
|                             | <i>C. albicans</i>   | 45 (97.8)           | 0 (0)    | 1 (2.2)   |         |
| Fluconazole                 | <i>C. tropicalis</i> | 26 (54.1)           | 1 (2.1)  | 21 (43.8) | < 0.001 |
|                             | <i>C. albicans</i>   | 45 (97.8)           | 0 (0)    | 1 (2.2)   |         |
| Posaconazole <sup>a</sup>   | <i>C. tropicalis</i> | 30 (62.5)           | NA       | 18 (37.5) | < 0.001 |
|                             | <i>C. albicans</i>   | 45 (97.8)           | NA       | 1 (2.2)   |         |
| Anidulafungin               | <i>C. tropicalis</i> | 47 (97.9)           | 0 (0)    | 1 (2.1)   | 0.325   |
|                             | <i>C. albicans</i>   | 46 (100)            | 0 (0)    | 0 (0)     |         |
| Micafungin                  | <i>C. tropicalis</i> | 47 (97.9)           | 0 (0)    | 1 (2.1)   | 0.325   |
|                             | <i>C. albicans</i>   | 46 (100)            | 0 (0)    | 0 (0)     |         |
| Caspofungin                 | <i>C. tropicalis</i> | 47 (97.9)           | 0 (0)    | 1 (2.1)   | 0.325   |
|                             | <i>C. albicans</i>   | 46 (100)            | 0 (0)    | 0 (0)     |         |
| Amphotericin B <sup>a</sup> | <i>C. tropicalis</i> | 48 (100)            | NA       | 0 (0)     | NA      |
|                             | <i>C. albicans</i>   | 46 (100)            | NA       | 0 (0)     |         |

Notes: <sup>a</sup>categorization based on the epidemiologic cut-off values (ECVs); Itraconazole and 5-flucytosine interpretation were not available for *C. albicans*. Abbreviations: MIC, minimal inhibitory concentration; GM, geometric mean; S, susceptible; WT, wild type; SDD, susceptible-dose dependent; I, intermediate; R, resistant; NWT, non-wild type; NA, not applicable
